# Supplementary material
Source: PubMed Central journal article supplement (PMC2941185)

**Supplementary Figure S1:** Rod outer segment (ROS) from bovine retina prepared and the purity of the fractions were assayed by running on a SDS-PAGE gel. The figure represents one of the 3 ROS prepared each from 12-16 bovine retinas. Fifteen microgram protein from the retinal homogenate (Retina), Crude ROS and Purified ROS was separated on the gel and stained with Gelcode Blue (Pierce, Rockford, IL). Purification of the prepared ROS was verified with the enrichment of the major ROS containing protein, Rhodopsin (arrow).

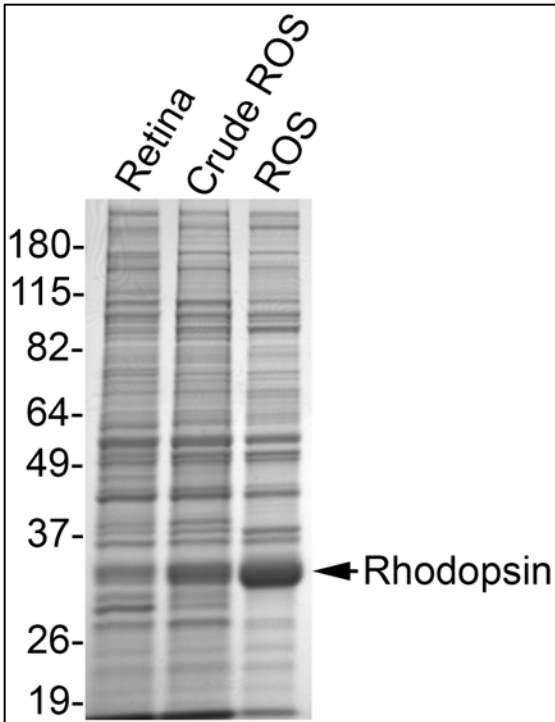

Supplement: supp_51_9_4422__1.pdf [file supp_51_9_4422__1.pdf]
