# Supplementary material
Source: PubMed Central journal article supplement (PMC2941185)

**Supplementary Figure S2:** Isolation of major phospholipids from bovine retina and various rat tissues. The figure represents one of the HP-TLC plates where the phospholipids were separated by running with three solvent and in two directions as described by Martin et al. 2005 [Martin, R. E., Elliott, M. H., Brush, R. S. and Anderson, R. E. (2005) Detailed characterization of the lipid composition of detergent-resistant membranes from photoreceptor rod outer segment membranes. *Investigative ophthalmology & visual science*, **46**, 1147-1154]. The lipid spots were visualized with 2,7-dichlorofluorescein and five classes, namely phosphatidylcholine (PC), phosphatidylethanolamine (PE), phosphatidylserine (PS), phosphatidylinositide (PI), and sphingomyelin (SM) were identified by comparison to commercially available standards and scraped from the plates. Lipids were extracted from the silica using chloroform:methanol:water (1:1:0.2), and quantified by lipid phosphorus assay.

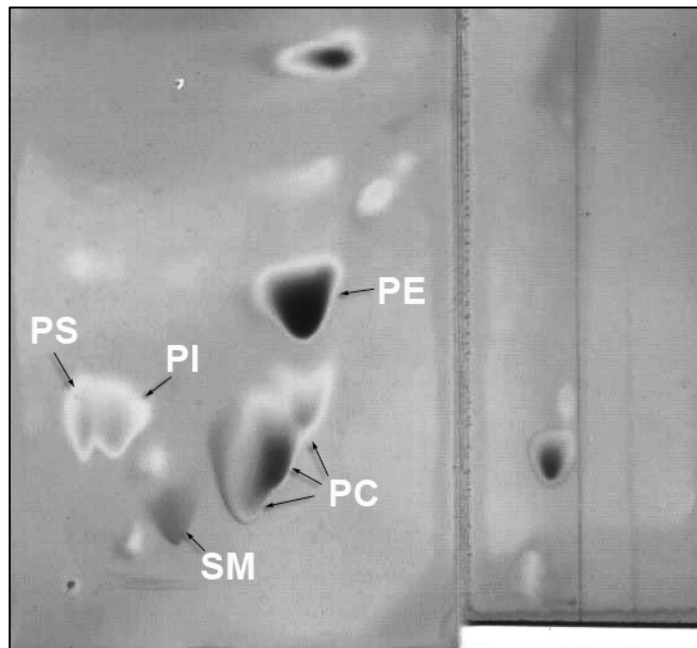

Supplement: supp_51_9_4422__2.pdf [file supp_51_9_4422__2.pdf]
